# Supplementary material
Source: HighWire-hosted journal article supplement (https://drc.bmj.com/content/11/4/e003482)

**Supplementary Table 1. Sensitivity analysis of logistic regression for combining amylase at entry [E] and annual****change rate of amylase [R] regarding the odds ratio (OR) for type 2 diabetes mellitus according to baseline age,****HbA1c, and BMI**

| A : Age (year)               | ≤48   |       |                        | ≥49   |       |                        |
|------------------------------|-------|-------|------------------------|-------|-------|------------------------|
|                              | n     | event | OR(95%CI)              | n     | event | OR(95%CI)              |
| E ≤57 and R ≤-2.0            | 138   | 54    | <b>4.18(2.68-6.5)</b>  | 81    | 34    | <b>3.84(2.28-6.46)</b> |
| E ≤57 and R ≥-1.9            | 717   | 104   | <b>1.41(1.06-1.9)</b>  | 550   | 78    | 0.97(0.72-1.32)        |
| E ≥58 and R ≤-2.0            | 603   | 164   | <b>3.48(2.66-4.55)</b> | 637   | 176   | <b>3.34(2.61-4.27)</b> |
| E ≥58 and R ≥-1.9            | 1859  | 168   | 1.00(ref.)             | 2332  | 243   | 1.00(ref.)             |
| B : HbA1c (%)                | ≤5.5  |       |                        | ≥5.6  |       |                        |
|                              | n     | event | OR(95%CI)              | n     | event | OR(95%CI)              |
| E ≤57 and R ≤-2.0            | 140   | 46    | <b>4.19(2.7-6.5)</b>   | 79    | 42    | <b>3.57(2.09-6.1)</b>  |
| E ≤57 and R ≥-1.9            | 892   | 95    | <b>1.35(1.02-1.79)</b> | 375   | 87    | 1.02(0.74-1.4)         |
| E ≥58 and R ≤-2.0            | 913   | 202   | <b>3.89(3.08-4.9)</b>  | 327   | 138   | <b>2.66(1.97-3.57)</b> |
| E ≥58 and R ≥-1.9            | 3060  | 200   | 1.00(ref.)             | 1131  | 211   | 1.00(ref.)             |
| C : BMI (kg/m <sup>2</sup> ) | ≤24.9 |       |                        | ≥25.0 |       |                        |
|                              | n     | event | OR(95%CI)              | n     | event | OR(95%CI)              |
| E ≤57 and R ≤-2.0            | 120   | 37    | <b>3.57(2.26-5.64)</b> | 99    | 51    | <b>4.85(2.91-8.08)</b> |
| E ≤57 and R ≥-1.9            | 871   | 114   | 1.19(0.93-1.54)        | 396   | 68    | 1.19(0.81-1.75)        |
| E ≥58 and R ≤-2.0            | 997   | 252   | <b>3.16(2.58-3.89)</b> | 243   | 88    | <b>4.3(2.91-6.35)</b>  |
| E ≥58 and R ≥-1.9            | 3504  | 327   | 1.00(ref.)             | 687   | 84    | 1.00(ref.)             |

**ORs were adjusted for age, sex, BMI, SBP, eGFR, fatty liver, current smoking, current physical activity, current****drinking habits, diabetes family history, and HbA1c**

Supplementary Table 2. Characteristics of participants according to serum amylase at entry and annual change

## rate of serum amylase

| A: Baseline serum amylase (IU/L)         | Q1: ≤57           | Q2:58-67          | Q3:68-78          | Q4:79-94          | Q5: ≥95          | P for            |
|------------------------------------------|-------------------|-------------------|-------------------|-------------------|------------------|------------------|
| n                                        | 1486              | 1285              | 1389              | 1439              | 1318             | trend            |
| <b>T2DM (%)</b>                          | <b>270(18.2)</b>  | <b>190(14.8)</b>  | <b>203(14.6)</b>  | <b>213(14.8)</b>  | <b>145(11)</b>   | <b>&lt;0.001</b> |
| <b>Male sex (%)</b>                      | <b>1182(79.5)</b> | <b>977(76)</b>    | <b>1008(72.6)</b> | <b>1013(70.4)</b> | <b>875(66.4)</b> | <b>&lt;0.001</b> |
| <b>Age (year)</b>                        | <b>48±8</b>       | <b>48±8</b>       | <b>49±9</b>       | <b>50±9</b>       | <b>53±9</b>      | <b>&lt;0.001</b> |
| Diabetes family history (%)              | 225(15.1)         | 204(15.9)         | 202(14.5)         | 231(16.1)         | 212(16.1)        | 0.494            |
| <b>BMI (kg/m<sup>2</sup>)</b>            | <b>24±3.1</b>     | <b>23.2±2.9</b>   | <b>22.7±2.7</b>   | <b>22.4±2.8</b>   | <b>21.7±2.6</b>  | <b>&lt;0.001</b> |
| <18.5                                    | 29(2)             | 54(4.2)           | 68(4.9)           | 95(6.6)           | 118(9)           | <0.001           |
| ≥25.0                                    | 495(33.3)         | 310(24.1)         | 251(18.1)         | 240(16.7)         | 129(9.8)         | <0.001           |
| <b>Systolic blood pressure (mmHg)</b>    | <b>125±16</b>     | <b>125±16</b>     | <b>123±15</b>     | <b>124±15</b>     | <b>122±15</b>    | <b>&lt;0.001</b> |
| <b>HbA1c (%)</b>                         | <b>5.4±0.3</b>    | <b>5.3±0.3</b>    | <b>5.4±0.3</b>    | <b>5.4±0.3</b>    | <b>5.3±0.3</b>   | <b>0.023</b>     |
| (mmol/mol)                               | 35±4              | 35±4              | 35±4              | 35±4              | 35±4             | 0.023            |
| <b>Fasting plasma glucose (mg/dL)</b>    | <b>97±8</b>       | <b>96±9</b>       | <b>95±8</b>       | <b>95±8</b>       | <b>93±8</b>      | <b>&lt;0.001</b> |
| <b>Fatty liver (%)</b>                   | <b>589(39.6)</b>  | <b>383(29.8)</b>  | <b>330(23.8)</b>  | <b>317(22)</b>    | <b>203(15.4)</b> | <b>&lt;0.001</b> |
| <b>ALT (IU/L)</b>                        | <b>28±21</b>      | <b>26±16</b>      | <b>24±15</b>      | <b>24±26</b>      | <b>23±16</b>     | <b>&lt;0.001</b> |
| <b>γ-GTP (IU/L)</b>                      | <b>57±60</b>      | <b>51±57</b>      | <b>47±56</b>      | <b>44±57</b>      | <b>38±44</b>     | <b>&lt;0.001</b> |
| <b>non-HDL cholesterol (mg/dL)</b>       | <b>151±33</b>     | <b>149±33</b>     | <b>147±33</b>     | <b>146±32</b>     | <b>148±33</b>    | <b>0.002</b>     |
| <b>eGFR (mL/min/1.73m<sup>2</sup>)</b>   | <b>77±15</b>      | <b>74±15</b>      | <b>73±15</b>      | <b>72±15</b>      | <b>68±14</b>     | <b>&lt;0.001</b> |
| <b>Serum amylase at censor (IU/L)</b>    | <b>52±13</b>      | <b>65±11</b>      | <b>75±14</b>      | <b>86±16</b>      | <b>111±29</b>    | <b>&lt;0.001</b> |
| <b>Annual change rate of amylase (%)</b> | <b>1.4±5.9</b>    | <b>0.6±3.8</b>    | <b>0.5±4</b>      | <b>0.0±4.9</b>    | <b>-0.5±4.6</b>  | <b>&lt;0.001</b> |
| <b>Current smoking (%)</b>               | <b>424(28.5)</b>  | <b>293(22.8)</b>  | <b>248(17.9)</b>  | <b>198(13.8)</b>  | <b>146(11.1)</b> | <b>&lt;0.001</b> |
| <b>Current physical activity (%)</b>     | <b>686(46.2)</b>  | <b>623(48.5)</b>  | <b>697(50.2)</b>  | <b>712(49.5)</b>  | <b>680(51.6)</b> | <b>0.005</b>     |
| <b>Current drinking habits (%)</b>       | <b>1293(87)</b>   | <b>1064(82.8)</b> | <b>1099(79.1)</b> | <b>1110(77.1)</b> | <b>942(71.5)</b> | <b>&lt;0.001</b> |

  

| B: Annual change rate of amylase (%) | Q1: ≤-2.0         | Q2:-1.9 ~ -0.6   | Q3:-0.5 ~ 0.8     | Q4:0.9 ~ 2.6      | Q5: ≥2.7         | P for            |
|--------------------------------------|-------------------|------------------|-------------------|-------------------|------------------|------------------|
| n                                    | 1459              | 1357             | 1434              | 1347              | 1320             | trend            |
| <b>T2DM (%)</b>                      | <b>428(29.3)</b>  | <b>136(10)</b>   | <b>103(7.2)</b>   | <b>108(8)</b>     | <b>246(18.6)</b> | <b>&lt;0.001</b> |
| <b>Male sex (%)</b>                  | <b>1035(70.9)</b> | <b>986(72.7)</b> | <b>1038(72.4)</b> | <b>1014(75.3)</b> | <b>982(74.4)</b> | <b>0.011</b>     |
| <b>Age (year)</b>                    | <b>49±9</b>       | <b>50±9</b>      | <b>49±9</b>       | <b>50±9</b>       | <b>50±9</b>      | <b>0.003</b>     |
| <b>Diabetes family history (%)</b>   | <b>325(22.3)</b>  | <b>211(15.5)</b> | <b>214(14.9)</b>  | <b>165(12.2)</b>  | <b>159(12)</b>   | <b>&lt;0.001</b> |
| <b>BMI (kg/m<sup>2</sup>)</b>        | <b>23±3.1</b>     | <b>22.8±2.9</b>  | <b>22.8±2.8</b>   | <b>22.8±2.8</b>   | <b>22.8±3</b>    | <b>0.166</b>     |
| <18.5                                | 68(4.7)           | 80(5.9)          | 72(5)             | 73(5.4)           | 71(5.4)          | 0.590            |
| ≥25.0                                | 342(23.4)         | 260(19.2)        | 300(20.9)         | 269(20)           | 254(19.2)        | 0.023            |

|                                       |                   |                   |                   |                   |                   |                  |
|---------------------------------------|-------------------|-------------------|-------------------|-------------------|-------------------|------------------|
| Systolic blood pressure (mmHg)        | 124±15            | 124±16            | 124±16            | 123±15            | 124±16            | 0.854            |
| <b>HbA1c (%)</b>                      | <b>5.4±0.4</b>    | <b>5.3±0.3</b>    | <b>5.3±0.3</b>    | <b>5.3±0.3</b>    | <b>5.4±0.3</b>    | <b>&lt;0.001</b> |
| <b>(mmol/mol)</b>                     | <b>35±4</b>       | <b>35±4</b>       | <b>35±4</b>       | <b>35±4</b>       | <b>36±4</b>       | <b>&lt;0.001</b> |
| <b>Fasting plasma glucose (mg/dL)</b> | <b>95±9</b>       | <b>95±8</b>       | <b>95±8</b>       | <b>95±8</b>       | <b>97±9</b>       | <b>&lt;0.001</b> |
| <b>Fatty liver (%)</b>                | <b>439(30.1)</b>  | <b>348(25.6)</b>  | <b>337(23.5)</b>  | <b>350(26)</b>    | <b>348(26.4)</b>  | <b>0.044</b>     |
| <b>ALT (IU/L)</b>                     | <b>26±26</b>      | <b>25±15</b>      | <b>25±16</b>      | <b>24±16</b>      | <b>25±21</b>      | <b>0.019</b>     |
| $\gamma$ -GTP (IU/L)                  | 49±63             | 46±46             | 46±46             | 47±52             | 52±67             | 0.923            |
| <b>non-HDL cholesterol (mg/dL)</b>    | <b>149±33</b>     | <b>150±32</b>     | <b>148±32</b>     | <b>148±33</b>     | <b>146±33</b>     | <b>0.001</b>     |
| eGFR (mL/min/1.73m <sup>2</sup> )     | 75±15             | 72±15             | 72±15             | 72±15             | 74±15             | 0.408            |
| <b>Serum amylase at entry (IU/L)</b>  | <b>83±26</b>      | <b>79±24</b>      | <b>75±23</b>      | <b>73±22</b>      | <b>71±22</b>      | <b>&lt;0.001</b> |
| <b>Serum amylase at censor (IU/L)</b> | <b>69±21</b>      | <b>73±22</b>      | <b>76±23</b>      | <b>81±24</b>      | <b>90±35</b>      | <b>&lt;0.001</b> |
| Current smoking (%)                   | 295(20.2)         | 232(17.1)         | 257(17.9)         | 257(19.1)         | 268(20.3)         | 0.580            |
| <b>Current physical activity (%)</b>  | <b>654(44.8)</b>  | <b>657(48.4)</b>  | <b>741(51.7)</b>  | <b>664(49.3)</b>  | <b>682(51.7)</b>  | <b>&lt;0.001</b> |
| <b>Current drinking habits (%)</b>    | <b>1126(77.2)</b> | <b>1078(79.4)</b> | <b>1149(80.1)</b> | <b>1093(81.1)</b> | <b>1062(80.5)</b> | <b>0.014</b>     |

**Supplementary Table 3. Comparison of characteristics between participants included and excluded in the analysis because of missing data**

| Characteristics                          | Participants included in the analysis |            | Excluded from the analysis because of missing data |                  | p value |
|------------------------------------------|---------------------------------------|------------|----------------------------------------------------|------------------|---------|
|                                          | 6917                                  | n          |                                                    |                  |         |
| Incident T2DM (%)                        | 1021(14.8)                            | 237        | 34(14.3)                                           | 0.859            |         |
| <b>Age (year)</b>                        | <b>50±9</b>                           | <b>237</b> | <b>54±10</b>                                       | <b>&lt;0.001</b> |         |
| <b>Male sex (%)</b>                      | <b>5055(73.1)</b>                     | <b>237</b> | <b>130(54.9)</b>                                   | <b>&lt;0.001</b> |         |
| <b>Diabetes family history (%)</b>       | <b>1074(15.5)</b>                     | <b>237</b> | <b>9(3.8)</b>                                      | <b>&lt;0.001</b> |         |
| BMI (kg/m <sup>2</sup> )                 | 22.8±2.9                              | 237        | 22.5±2.8                                           | 0.082            |         |
| <18.5                                    | 364(5.3)                              | 237        | 15(6.3)                                            | 0.471            |         |
| ≥25.0                                    | 1425(20.6)                            | 237        | 48(20.3)                                           | 0.896            |         |
| Systolic blood pressure (mmHg)           | 124±16                                | 237        | 123±15                                             | 0.264            |         |
| <b>HbA1c (%)</b>                         | <b>5.4±0.3</b>                        | <b>237</b> | <b>5.5±0.3</b>                                     | <b>&lt;0.001</b> |         |
| <b>(mmol/mol)</b>                        | <b>35±4</b>                           | <b>237</b> | <b>36±4</b>                                        | <b>&lt;0.001</b> |         |
| Fasting plasma glucose (mg/dL)           | 95±8                                  | 237        | 95±8                                               | 0.837            |         |
| Fatty liver (%)                          | 1822(26.3)                            | 233        | 51(21.9)                                           | 0.128            |         |
| <b>ALT (IU/L)</b>                        | <b>25±19</b>                          | <b>237</b> | <b>22±11</b>                                       | <b>&lt;0.001</b> |         |
| <b>γ-GTP (IU/L)</b>                      | <b>48±55</b>                          | <b>237</b> | <b>37±35</b>                                       | <b>&lt;0.001</b> |         |
| <b>Non-HDL cholesterol (mg/dL)</b>       | <b>148±33</b>                         | <b>237</b> | <b>153±33</b>                                      | <b>0.026</b>     |         |
| <b>eGFR (mL/min/1.73m<sup>2</sup>)</b>   | <b>73±15</b>                          | <b>237</b> | <b>75±15</b>                                       | <b>0.048</b>     |         |
| Serum amylase level at entry (IU/L)      | 76±24                                 | 237        | 74±24                                              | 0.136            |         |
| Serum amylase level at censor (IU/L)*    | 77±27                                 | 237        | 77±24                                              | 0.727            |         |
| <b>Annual change rate of amylase (%)</b> | <b>0.4±4.8</b>                        | <b>236</b> | <b>1.3±4.2</b>                                     | <b>0.004</b>     |         |
| <b>Current smoking (%)</b>               | <b>1309(18.9)</b>                     | <b>30</b>  | <b>1(3.3)</b>                                      | <b>0.029</b>     |         |
| <b>Current physical activity (%)</b>     | <b>3398(49.1)</b>                     | <b>41</b>  | <b>31(75.6)</b>                                    | <b>0.001</b>     |         |
| Current drinking habits (%)              | 5508(79.6)                            | 58         | 41(70.7)                                           | 0.093            |         |

\*"at censor" means serum amylase level at the end of the study period in non-T2DM controls or when T2DM was ascertained in T2DM cases.

**Supplemental figure 1. The receiver operating characteristic curve to determine the cut-off value for the annual change in amylase, a predictor of T2DM.**

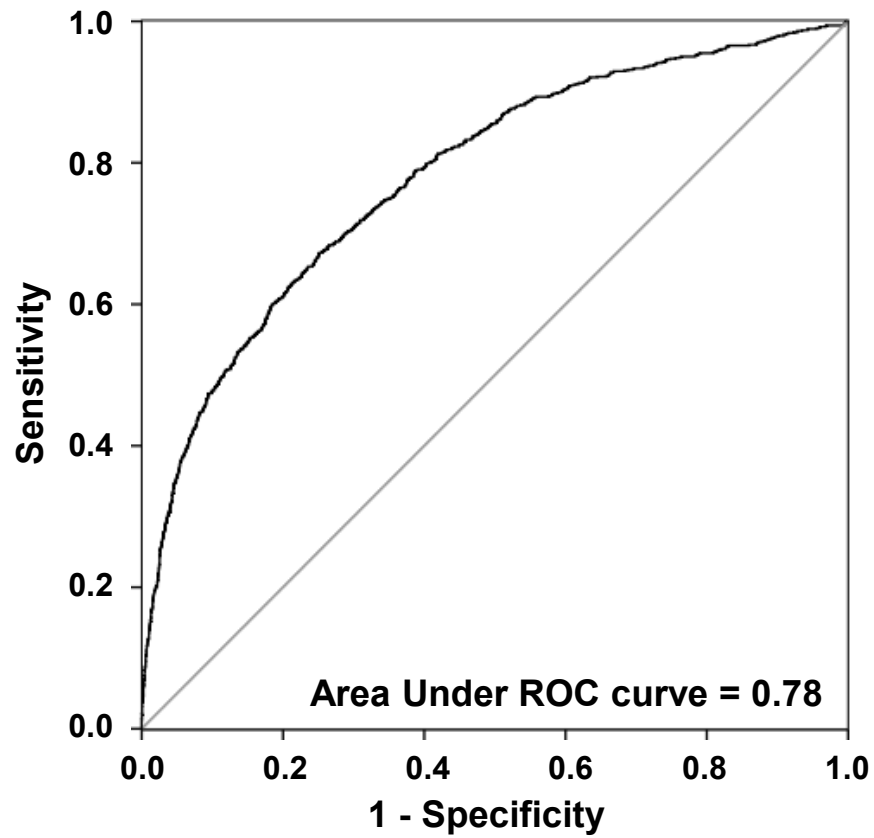

Supplement: inline-supplementary-material-1 [file inline-supplementary-material-1.pdf]
